# Supplementary material
Source: publisher figshare collection journal article supplement (https://frontiersin.figshare.com/ndownloader/files/34919532)
Supplement: Supplementary file [file 34919532]

**Supplemental Table 1** Scale for quality assessment of molecular association studies of BC

| Criterion                                                                                                  | Score |
|------------------------------------------------------------------------------------------------------------|-------|
| Source of case                                                                                             |       |
| Selected from population or cancer registry                                                                | 3     |
| Selected from hospital                                                                                     | 2     |
| Selected from pathology archives, but without description                                                  | 1     |
| Not described                                                                                              | 0     |
| Source of control                                                                                          |       |
| Population-based                                                                                           | 3     |
| Blood donors or volunteers                                                                                 | 2     |
| Hospital-based                                                                                             | 1     |
| Not described                                                                                              | 0     |
| Ascertainment of cancer                                                                                    |       |
| Histological or pathological confirmation                                                                  | 2     |
| Diagnosis of BC by patient medical record                                                                  | 1     |
| Not described                                                                                              | 0     |
| Ascertainment of control                                                                                   |       |
| Controls were tested to screen out BC                                                                      | 2     |
| Controls were subjects who did not report BC, no objective testing                                         | 1     |
| Not described                                                                                              | 0     |
| Matching                                                                                                   |       |
| Controls matched with cases by age                                                                         | 2     |
| Not matched or not described                                                                               | 0     |
| Source of genotyping material of case                                                                      |       |
| Appropriate DNA sources (such as peripheral blood, buccal swabs and saliva, and so on)                     | 2     |
| Tumor tissue                                                                                               | 1     |
| Not described                                                                                              | 0     |
| Genotyping examination                                                                                     |       |
| Genotyping done blindly and quality control                                                                | 2     |
| Only genotyping done blindly or quality control                                                            | 1     |
| Unblinded and without quality control                                                                      | 0     |
| HWE                                                                                                        |       |
| HWE in the control group                                                                                   | 2     |
| Hardy-Weinberg disequilibrium in the control group                                                         | 0     |
| Association assessment                                                                                     |       |
| Assess association between genotypes and BC with appropriate statistics and adjustment for confounders     | 2     |
| Assess association between genotypes and BC with appropriate statistics without adjustment for confounders | 1     |
| Inappropriate statistics used                                                                              | 0     |
| Total sample size                                                                                          |       |
| >1000                                                                                                      | 3     |
| 500-1000                                                                                                   | 2     |
| 200-500                                                                                                    | 1     |
| <200                                                                                                       | 0     |

HWE: Hardy-Weinberg equilibrium, BC: Breast cancer
